# Supplementary material for: Hyperglycaemia but not hyperlipidaemia causes beta cell dysfunction and beta cell loss in the domestic cat
Source: Springer Nature journal article supplement (doi:10.1007/s00125-008-1201-y), 2008-11-26
Supplement: 125_2008_1201_MOESM2_ESM.pdf [file 125_2008_1201_MOESM2_ESM.pdf]

**ESM Table 1** Fatty acid composition of Lipoventoes 10% (Fresenius-Kabi)

| Fatty acid     | Percentage (%) |
|----------------|----------------|
| Linoleic acid  | 54             |
| Linolenic acid | 8              |
| Oleic acid     | 26             |
| Palmitic acid  | 9              |
| Stearic acid   | 3              |
