# Supplementary material for: Hyperglycaemia but not hyperlipidaemia causes beta cell dysfunction and beta cell loss in the domestic cat
Source: Springer Nature journal article supplement (doi:10.1007/s00125-008-1201-y), 2008-11-26
Supplement: 125_2008_1201_MOESM3_ESM.pdf [file 125_2008_1201_MOESM3_ESM.pdf]

**ESM Table 2** Feline-specific primers and probes for quantitative mRNA analysis

| Gene          | Sense (5'–3')            | Antisense (5'–3')         | Probe (5'–3')                                      | Product size (bp) |
|---------------|--------------------------|---------------------------|----------------------------------------------------|-------------------|
| Insulin       | TTCGTCAACCAGCACCTGTG     | CACAGCATTGCTCCACGATG      |                                                    | 217               |
| <i>Fas</i>    | AGAGCATGGCTTAGAAGTGGAAA  | CTGAGAGACGTTACAAAAAAGTTGA |                                                    | 91                |
| <i>Flip</i>   | GCAAGCCCCTGGGAATCT       | CAGGCAACTTGGCGAAGAA       |                                                    | 151               |
| <i>Il6</i>    | CCCTGCAGACAAAATGGAAGA    | GTGCCTCCTTGCTGTCCTCA      | TGTTATAGTTGTCACACATCTCCTTTTTTCAGTGCAGA             | 110               |
| <i>Il1b</i>   | AATGACCTGTTCTTTGAGGCTGAT | CCAGAAAAGTGTGGCTCAGGTT    | CGAAAAGATGAAGGGCAGCCTCCAA                          | 76                |
| <i>Tnfa</i>   | CTTCTCGAACTCCGAGTGACAAG  | CCACTGGAGTTGCCCTTCA       | TAGCCCATGTAGTAGCAAACCCGAAGC                        | 74                |
| <i>Il8</i>    | TCGATGCCAGTGCATAAAAACT   | GTGTGGGCCACTGTCAATCA      |                                                    | 85                |
| <i>Mcp-1</i>  | TGCAGAGGCTGGTGAGCTATAA   | TTGGGTCAGCGCAGATCTC       |                                                    | 102               |
| <i>Gapdh</i>  | GCCATCAATGACCCCTTCAT     | GCCGTGGAATTTGCCGT         | CTCAACTACATGGTCTACATGTTCCAGTATGATTCCA <sup>a</sup> | 82                |
| Cyclophilin A | CAAAGTTCCCAAGACAGCAGAGA  | AGTGCCATTATGGCGTGTGAA     |                                                    | 139               |

<sup>a</sup>Primers for *Gapdh* are adequate for SYBR-Green detection
