# Supplementary material for: Hyperglycaemia but not hyperlipidaemia causes beta cell dysfunction and beta cell loss in the domestic cat
Source: Springer Nature journal article supplement (doi:10.1007/s00125-008-1201-y), 2008-11-26
Supplement: 125_2008_1201_MOESM4_ESM.pdf [file 125_2008_1201_MOESM4_ESM.pdf]

**ESM Table 3** Antibodies used for immunohistochemistry that lacked sufficient cross reactivity with macrophages in cat paraffin-embedded tissues

|    | Antigen                         | Clone       | Reactivity | Company                                     |
|----|---------------------------------|-------------|------------|---------------------------------------------|
| 1  | Anti-phospho-M-CSF R (Y723)     | Polyclonal  | Human      | R&D, Abingdon, UK                           |
| 2  | Calprotectin                    | MAC387      | Human      | Dako, Baar, Switzerland                     |
| 3  | CD68                            | GHI/61      | Human      | BD Pharmingen, Heidelberg, Germany          |
| 4  | CD68                            | KP1         | Human      | Dako                                        |
| 5  | CD68                            | PG-M1       | Human      | Dako                                        |
| 6  | CD163                           | 163C01/10D6 | Human      | Neomarkers-Lab Vision, Newmarket, UK        |
| 7  | F4/80                           | BM8         | Mouse      | BMA Biomedicals, Basel, Switzerland         |
| 8  | F4/80                           | C1:A3-1     | Mouse      | Serotec, Oxford, UK                         |
| 9  | Macrophage receptor scavenger-I | Polyclonal  | Human      | Abcam, Cambridge, UK                        |
| 10 | Macrophage (unspecified)        | HAM56       | Human, rat | Abcam                                       |
| 11 | Macrophage (unspecified)        | LN-5        | Human      | Abcam                                       |
| 12 | Macrophage (unspecified)        | RAM11       | Rabbit     | Dako                                        |
| 13 | Macrophage (unspecified)        | 3A5         | Human      | Abcam                                       |
| 14 | Mac3                            | M3-84       | Mouse      | Cedarlane Laboratories, Burlington, NC, USA |
