# Supplementary figures and images for: Hyperglycaemia but not hyperlipidaemia causes beta cell dysfunction and beta cell loss in the domestic cat
Source: Springer Nature journal article supplement (doi:10.1007/s00125-008-1201-y), 2008-11-26

ESM Fig. 1

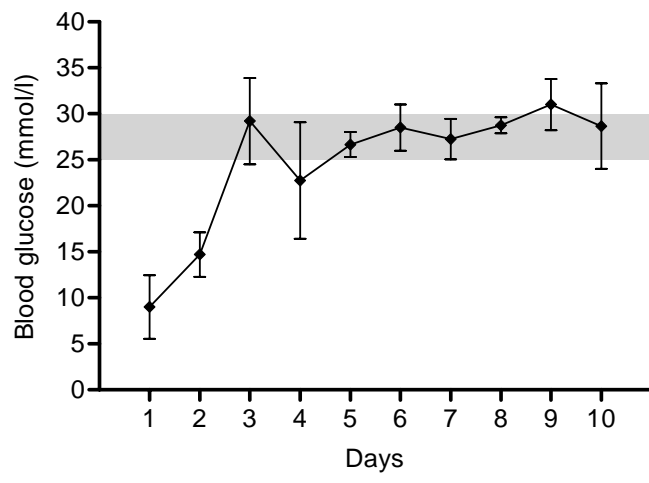

Supplement: 125_2008_1201_MOESM5_ESM.pdf [file 125_2008_1201_MOESM5_ESM.pdf]

# ESM Figure 2a

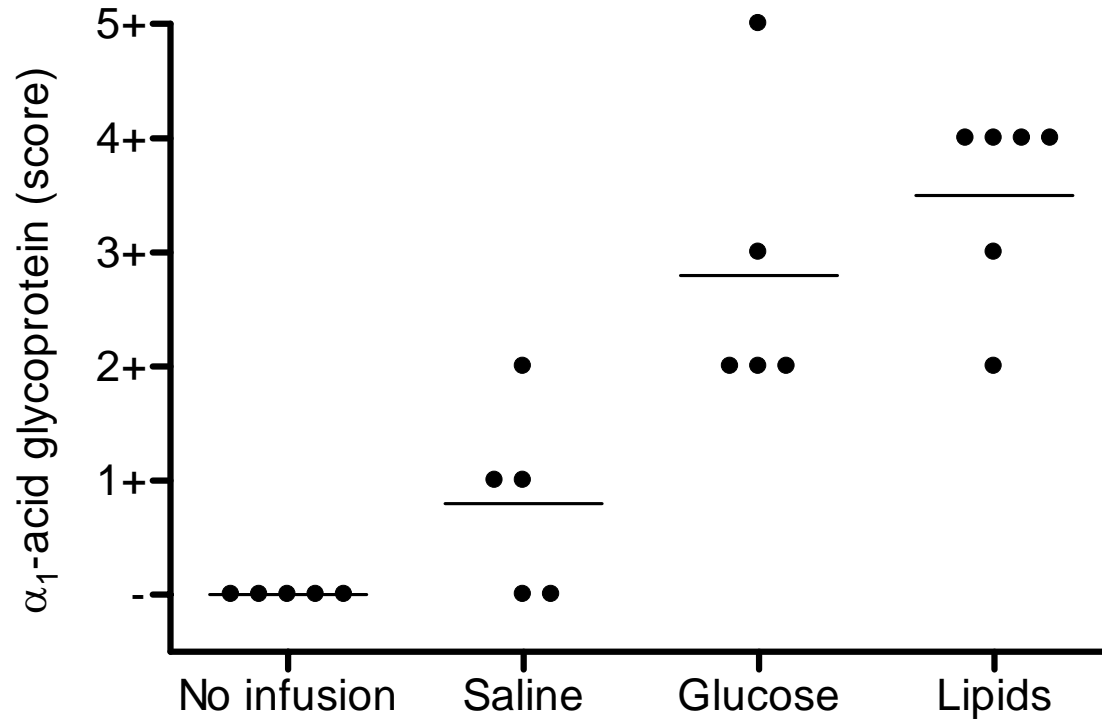

# ESM Figure 2b

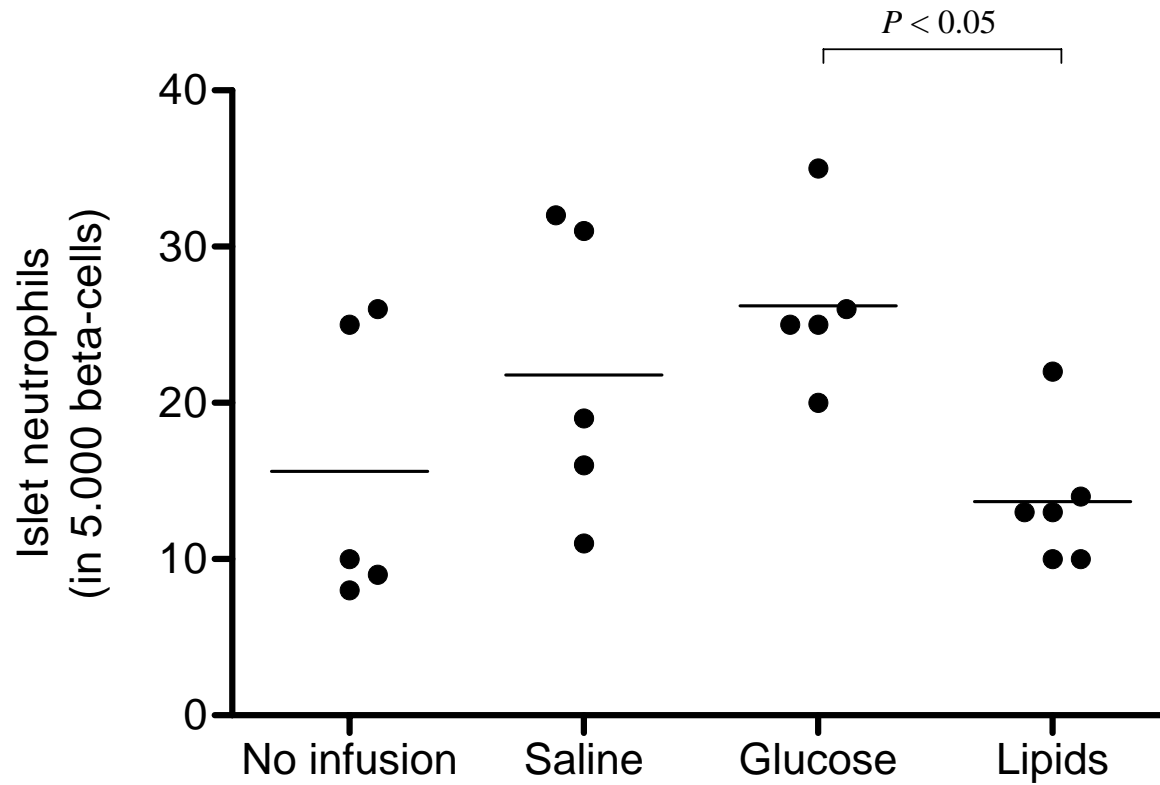

# ESM Figure 2c

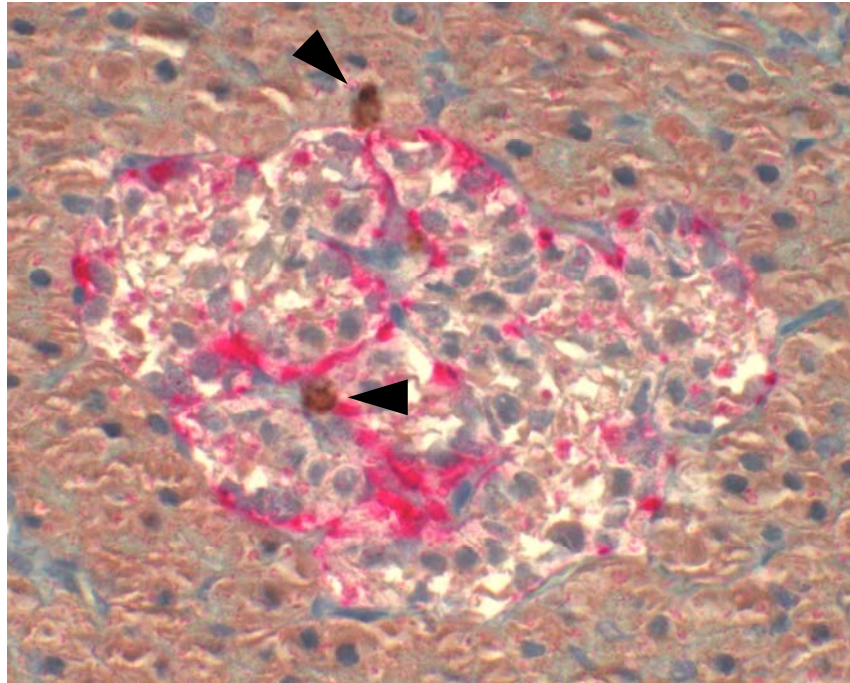

# ESM Figure 2d

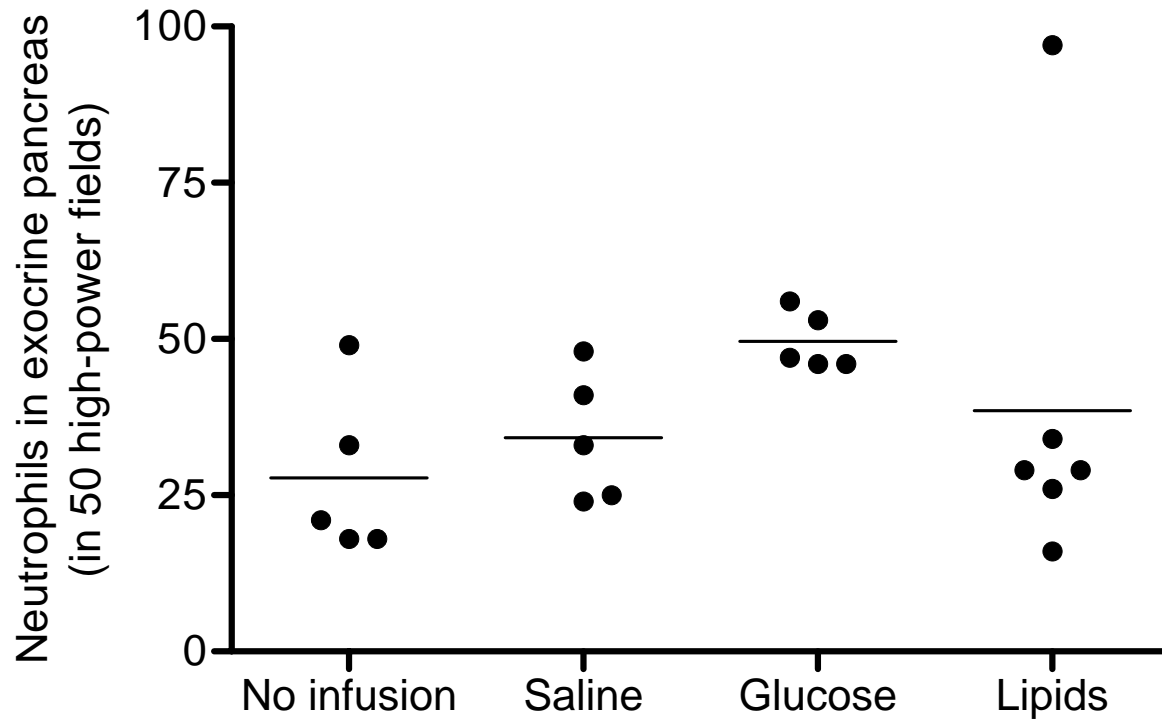

Supplement: 125_2008_1201_MOESM6_ESM.pdf [file 125_2008_1201_MOESM6_ESM.pdf]
